# Supplementary material for: High-Throughput Profiling of Colorectal Cancer Liver Metastases Reveals Intra- and Inter-Patient Heterogeneity in the EGFR and WNT Pathways Associated with Clinical Outcome
Source: MDPI journal article supplement (doi:10.3390/cancers14092084), 2022-04-21
Supplement: s1 [file s1]

**A**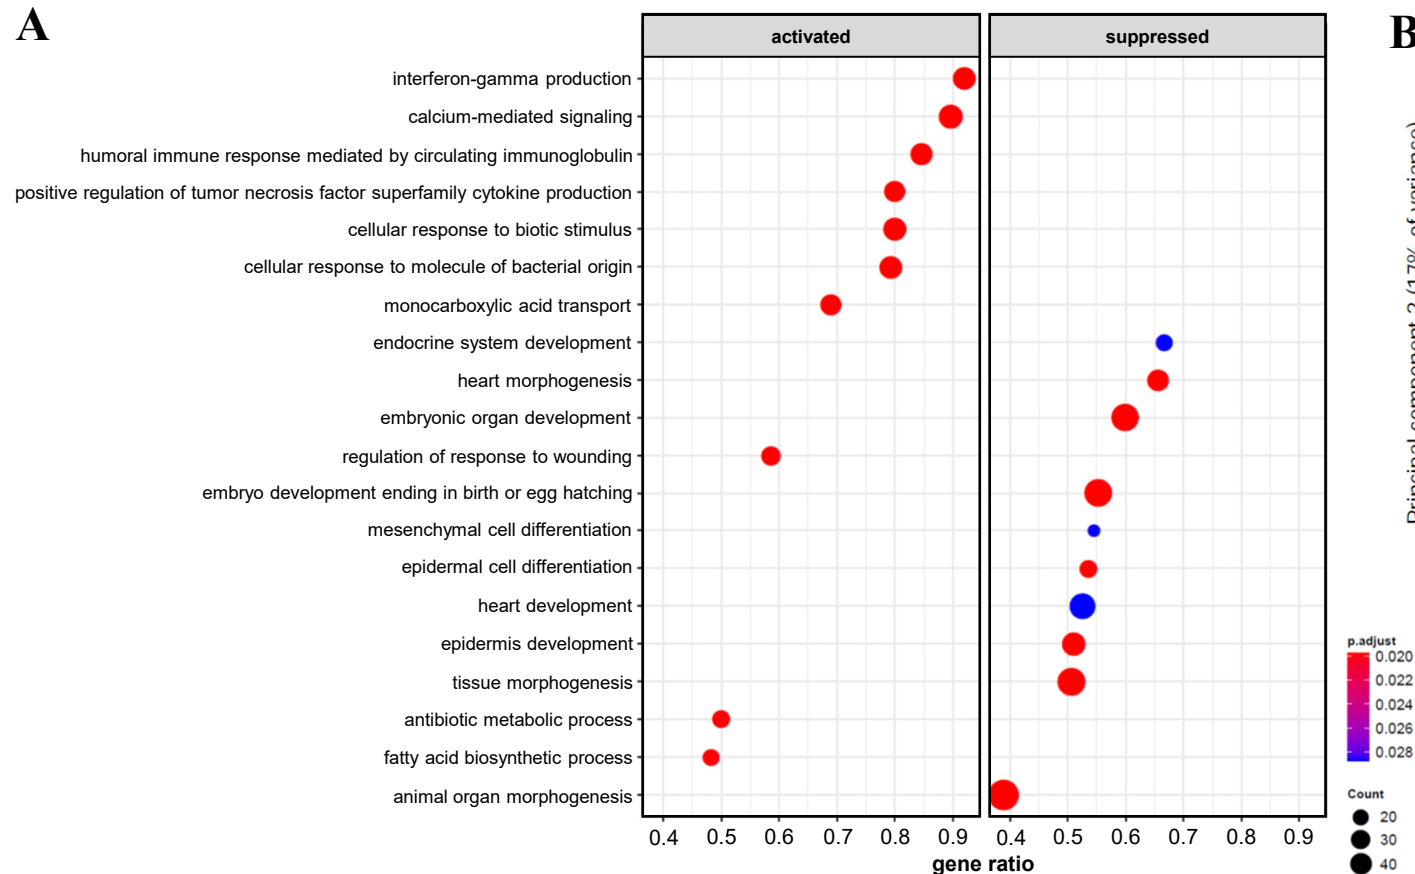**B**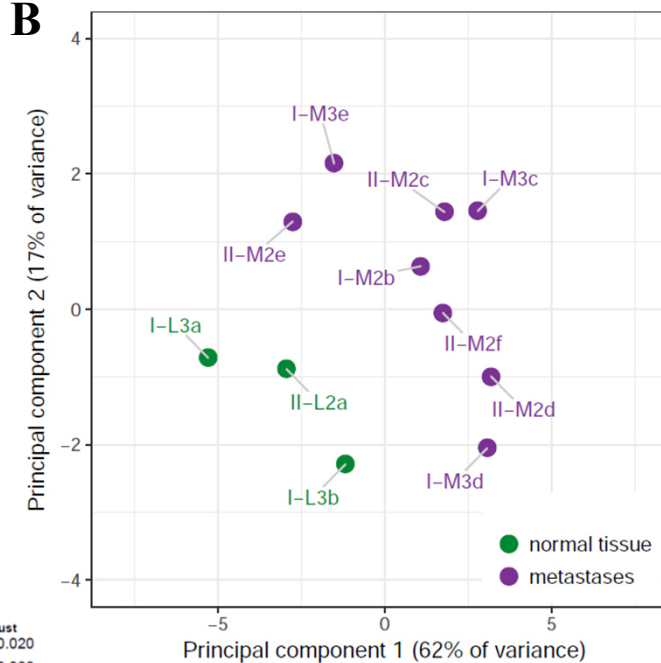

**Figure S4: A**, GSEA plot depicting the enrichment of the top 10 up-/downregulated gene sets (≥20 genes) associated with the GO category biological process (BP) for genes differentially expressed in patient I and II. **B**, Principal component analysis of normal liver and metastatic tissue of patients I and II based on protein measurements. Clustering of normal tissue samples is less distinct than of CRLM compared with gene expression data.
