# Supplementary material for: High-Throughput Profiling of Colorectal Cancer Liver Metastases Reveals Intra- and Inter-Patient Heterogeneity in the EGFR and WNT Pathways Associated with Clinical Outcome
Source: MDPI journal article supplement (doi:10.3390/cancers14092084), 2022-04-21
Supplement: s1 [file s1]

## Patient I

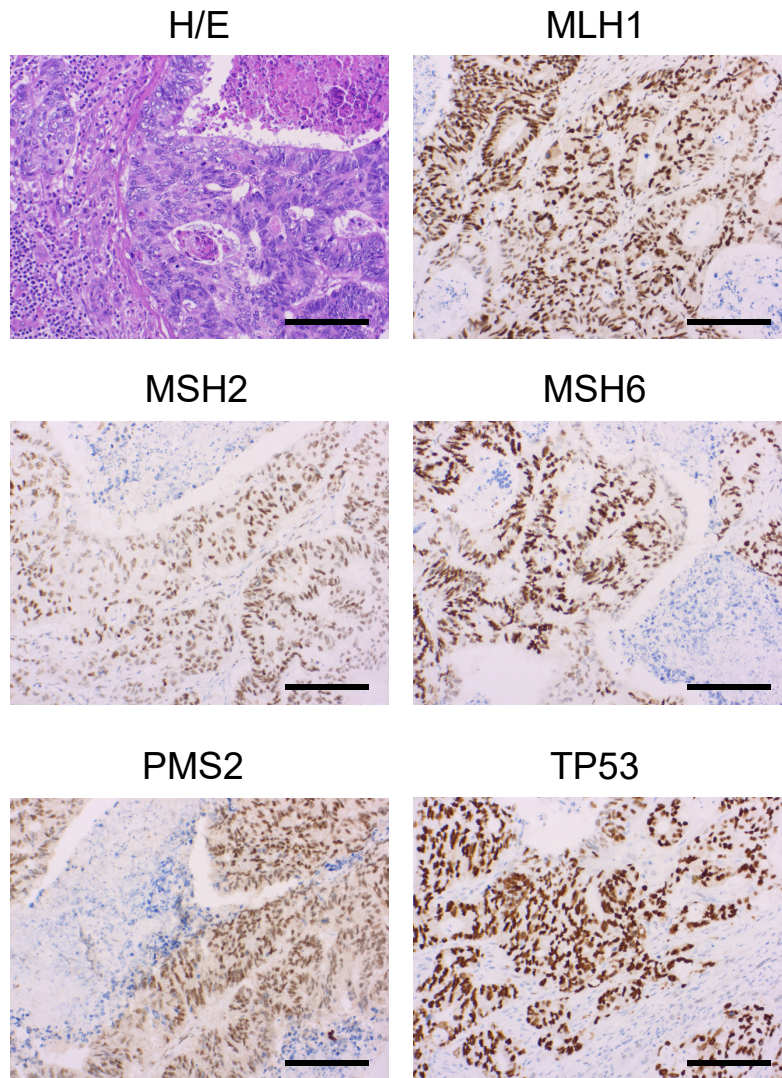

## Patient II

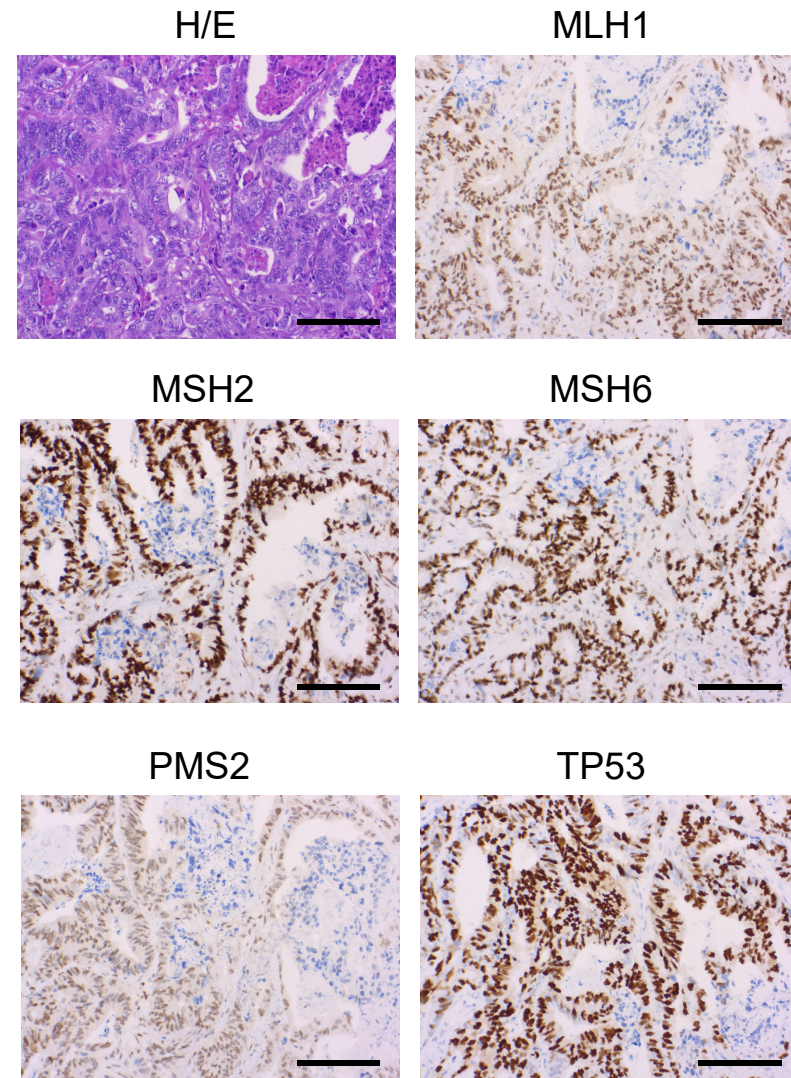

**Figure S1: Expression of mismatch repair proteins and TP53 in CRLM from both patients.** Representative H&E and immunohistochemical stainings of FFPE tissue samples from CRLM of both patients for the expression of all four mismatch repair proteins (MLH1, MSH2, MSH6, PMS2) as well as for the tumor suppressor TP53. Scale bar: 100  $\mu$ m.
