# Supplementary material for: High-Throughput Profiling of Colorectal Cancer Liver Metastases Reveals Intra- and Inter-Patient Heterogeneity in the EGFR and WNT Pathways Associated with Clinical Outcome
Source: MDPI journal article supplement (doi:10.3390/cancers14092084), 2022-04-21
Supplement: s1 [file s1]

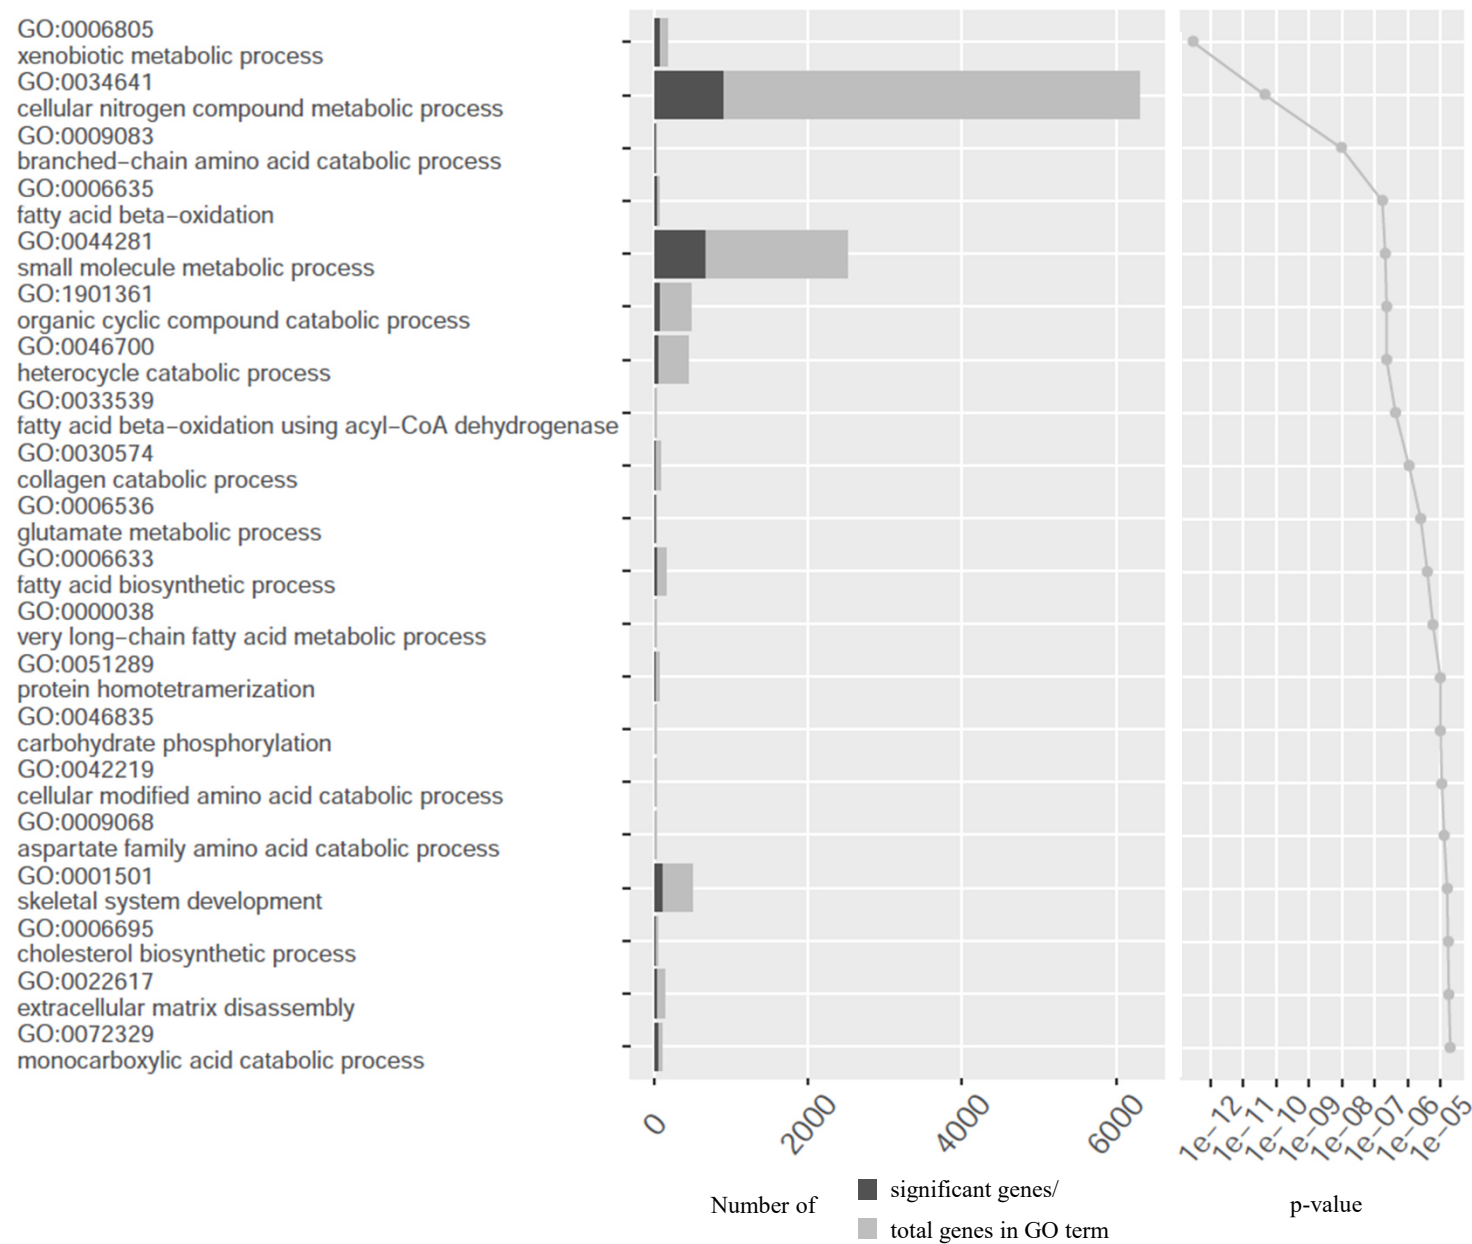

**Figure S2: GO term enrichment results comparing normal against metastatic tissue based on RNAseq data.** Listed are the top 20 significant GO terms.
