# Supplementary material for: High-Throughput Profiling of Colorectal Cancer Liver Metastases Reveals Intra- and Inter-Patient Heterogeneity in the EGFR and WNT Pathways Associated with Clinical Outcome
Source: MDPI journal article supplement (doi:10.3390/cancers14092084), 2022-04-21
Supplement: s1 [file s1]

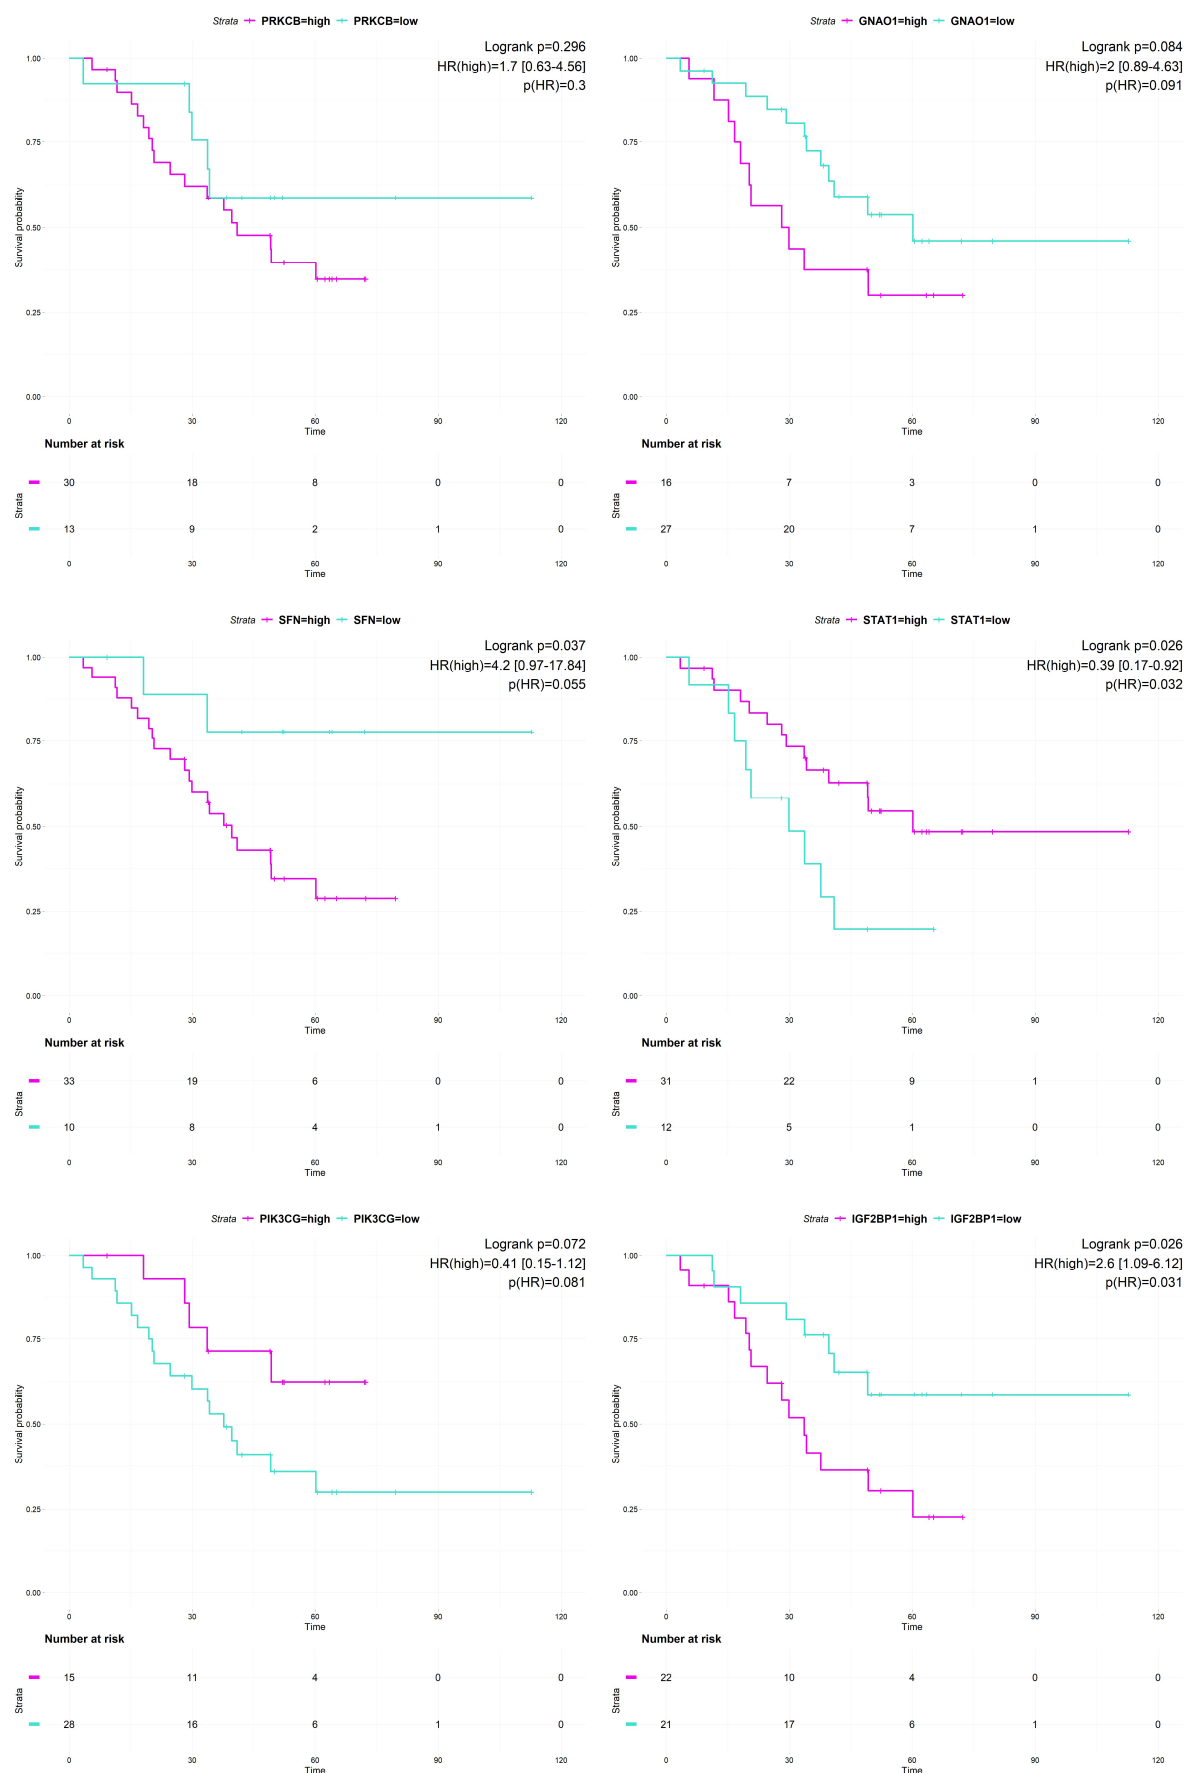

**Figure S5: Prognostic relevance of the identified MRs and MEs in CRC liver metastases.** Liver metastases of 43 CRC patients were characterized by RNA-Seq and the prognostic relevance of the identified MR and ME genes was assessed in Kaplan-Meier plots. Significance was calculated with a logrank test.
