# Supplementary material for: High-Throughput Profiling of Colorectal Cancer Liver Metastases Reveals Intra- and Inter-Patient Heterogeneity in the EGFR and WNT Pathways Associated with Clinical Outcome
Source: MDPI journal article supplement (doi:10.3390/cancers14092084), 2022-04-21
Supplement: s1 [file s1]

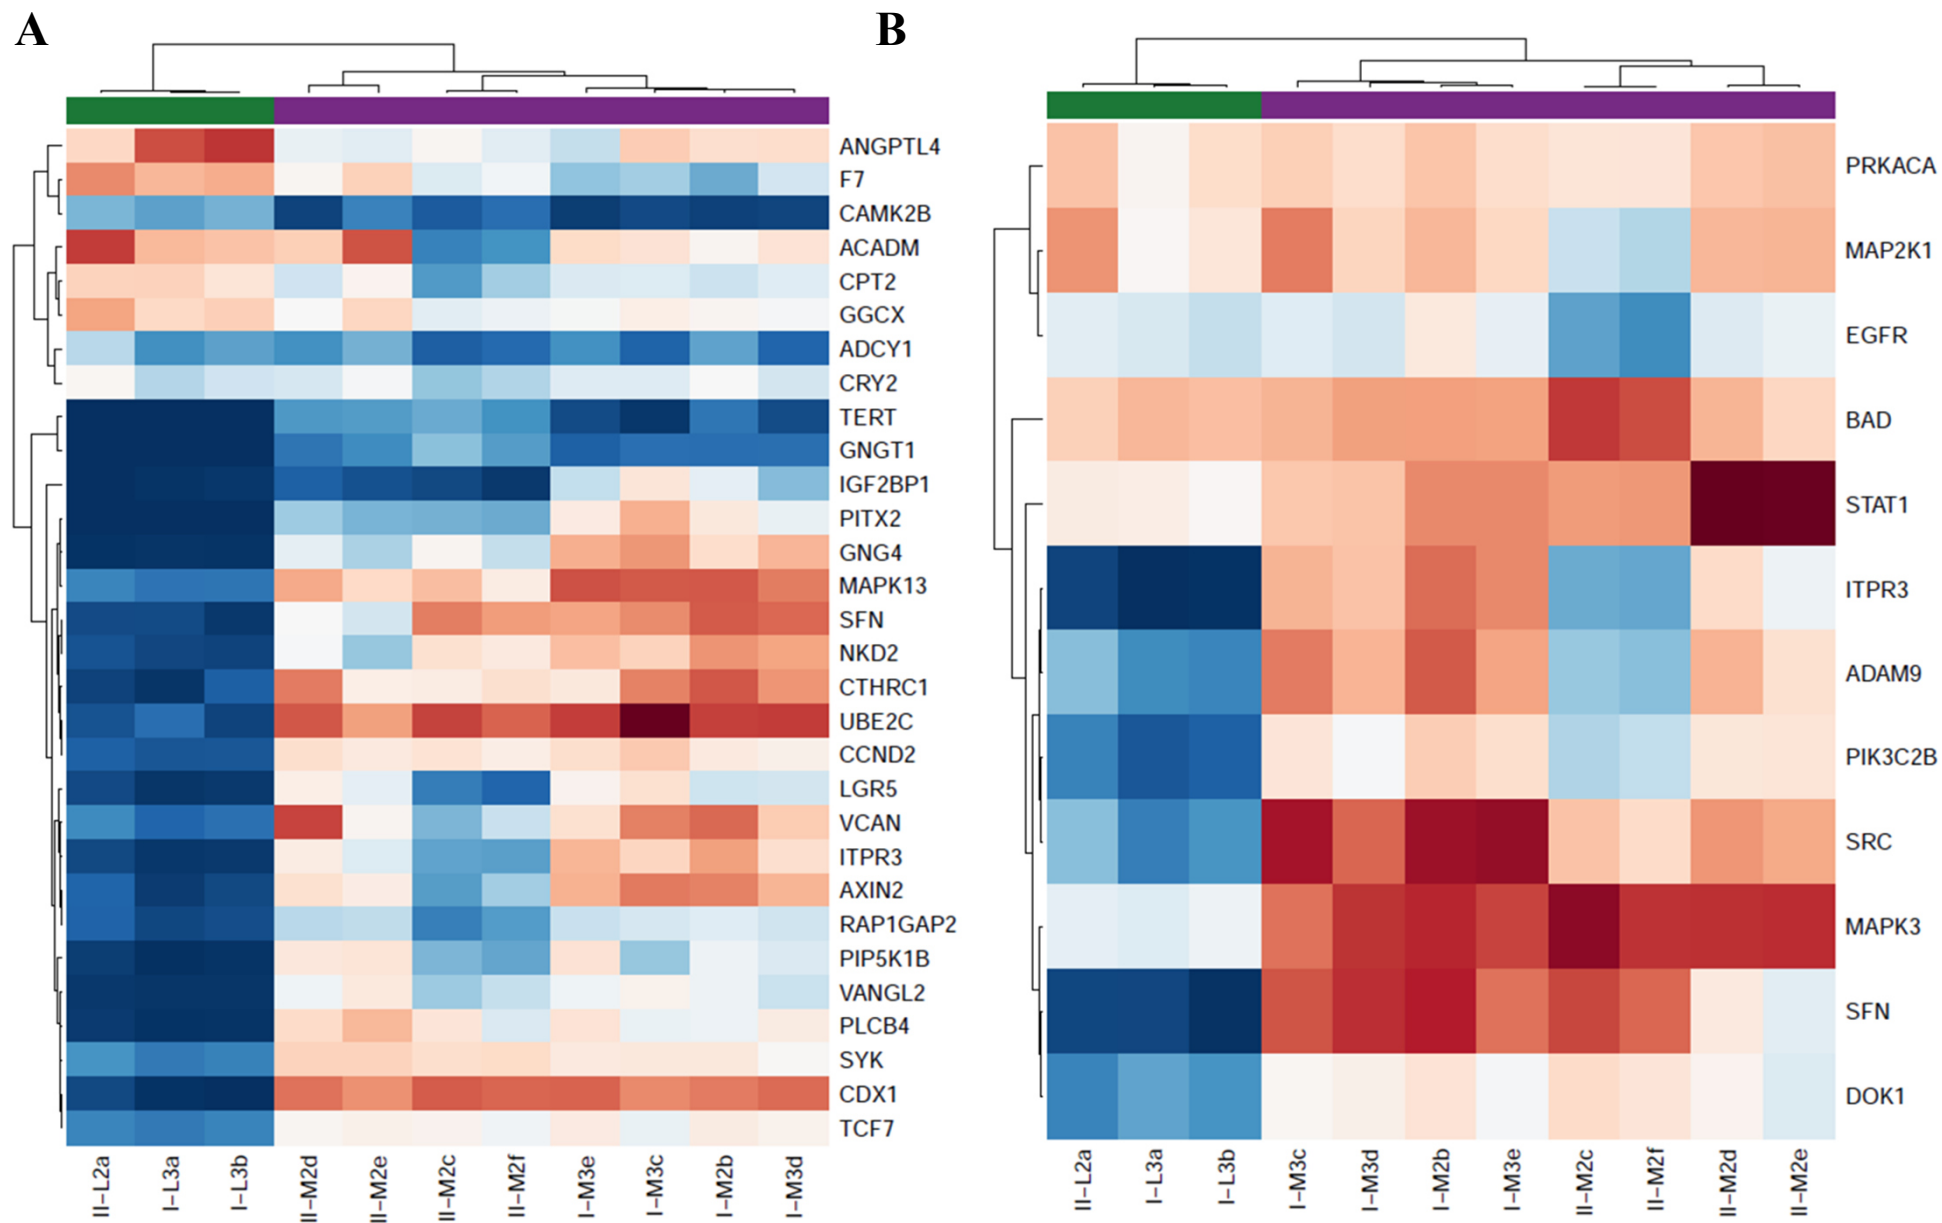

**Figure S3: Pathway specific heatmaps displaying log2 transcripts per million (TPM) of the top differentially expressed transcripts comparing normal tissue against metastatic tissue. A) Top 30 differentially expressed transcripts related to WNT signaling. B) Top 12 differentially expressed transcripts related to EGFR signaling. This corresponds to the total number of differentially regulated EGFR pathway-related transcripts.**
